# Supplementary material for: Neurotrophin Promotes Neurite Outgrowth by Inhibiting Rif GTPase Activation Downstream of MAPKs and PI3K Signaling
Source: MDPI journal article supplement (doi:10.3390/ijms18010148), 2017-01-13
Supplement: s1 [file s1]

# Supplementary Materials: Neurotrophin Promotes Neurite Outgrowth by Inhibiting Rif GTPase Activation Downstream of MAPKs and PI3K Signaling

Xiaoxia Tian, Huijuan Yan, Jiayi Li, Shuang Wu, Junyu Wang and Lifei Fan

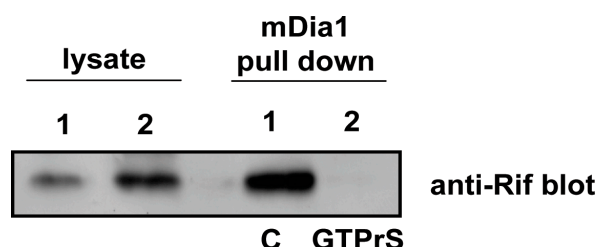

**Figure S1.** Rif might persist in the guanosine 5'-triphosphate (GTP)-bound state under resting situation.

HeLa cells were serum starved overnight, and then two 10 cm<sup>2</sup> of cells were lysed with the lysis buffer D (50 mM Tris.Cl pH 7.2, 1% Triton X-100, 500 mM NaCl, 0.1 mM PMSF, ethylene diamine tetraacetic acid (EDTA) free protease inhibitors cocktail). The first lysate (labeled as 1) were left untreated and the second lysate (labeled as 2) were loaded with GTPγS. To load GTPγS, 6 μL of 10 mM GTPγS (≥100 μM final concentration), 12 μL of 0.5 M EDTA pH 8.0 (≥10 mM final concentration) were added to the supernatant. Rotate 30 min at 4 °C. The exchange reaction was terminated by adding 38 μL of 1 M MgCl<sub>2</sub> to each tube. 200 μL miDia1-G-DID beads were added to each of the tubes and rotate 45 min at 4 °C. The beads were washed three times with wash buffer and followed by immune blotting analysis. The endogenous Rif could not be loaded with GTPγS due to its high GTP binding percentage in the steady status.

**Table S1.** Plasmid constructs used in the study.

| Construct       | Residues    | Mutations                      | Vector   | Source      |
|-----------------|-------------|--------------------------------|----------|-------------|
| pEGFP-N3        | Full length | -                              | pEGFP-N3 | Lab storage |
| myc-Rif WT      | Full length | -                              | pcDNA3   | [21]        |
| myc-Rif QL      | Full length | Glutamine(Q)77 > Leucine(L)    | pcDNA3   | [21]        |
| myc-Rif TN      | Full length | Threonine(T)33 > Asparagine(N) | pcDNA3   | [21]        |
| myc-plexinA4    | Full length | -                              | pCAG     | Sockanathan |
| GST-mDia1-G-DID | 73–370 aa   | -                              | pGEX-4T1 | Rosen       |
| pGEX-4T1-RifWT  | 1–195 aa    | -                              | pGEX-4T1 | Ahmadian    |
| HA-FARP1        | Full length | -                              | pcDNA3   | [26]        |
